# Supplementary material for: Antimicrobial capacity of Leucocyte-and Platelet Rich Fibrin against periodontal pathogens
Source: PubMed Central journal article supplement (PMC6547693; doi:10.1038/s41598-019-44755-6), 2019-06-03

# *Antimicrobial capacity of Leucocyte-and Platelet Rich Fibrin against periodontal pathogens*

---

Ana B. Castro\*<sup>1</sup>, Esteban R. Herrero<sup>1</sup>, Vera Slomka<sup>1</sup>, Nelson Pinto<sup>2</sup>, Wim Teughels<sup>1</sup>, Marc Quirynen<sup>1</sup>

<sup>1</sup> Department of Oral Health Sciences, Periodontology, KU Leuven & Dentistry, University Hospitals Leuven, Belgium.

<sup>2</sup> Faculty of Dentistry, Postgraduate Implant Program, University of the Andes, Santiago, Chile.

**Figure S1.** Colony forming units from *P. gingivalis*. Ratio 1:1 : 150  $\mu$ l bacteria + 150  $\mu$ l L-PRF exudate, Ratio 1:2 : 150  $\mu$ l bacteria + 75  $\mu$ l L-PRF exudate + 75  $\mu$ l saline, and Ratio 1:4 : 150  $\mu$ l bacteria + 37.5  $\mu$ l L-PRF exudate + 112.5  $\mu$ l saline. Control+: 150  $\mu$ l bacteria + 150  $\mu$ l saline. A: standardized RGB color image; B: binary image.

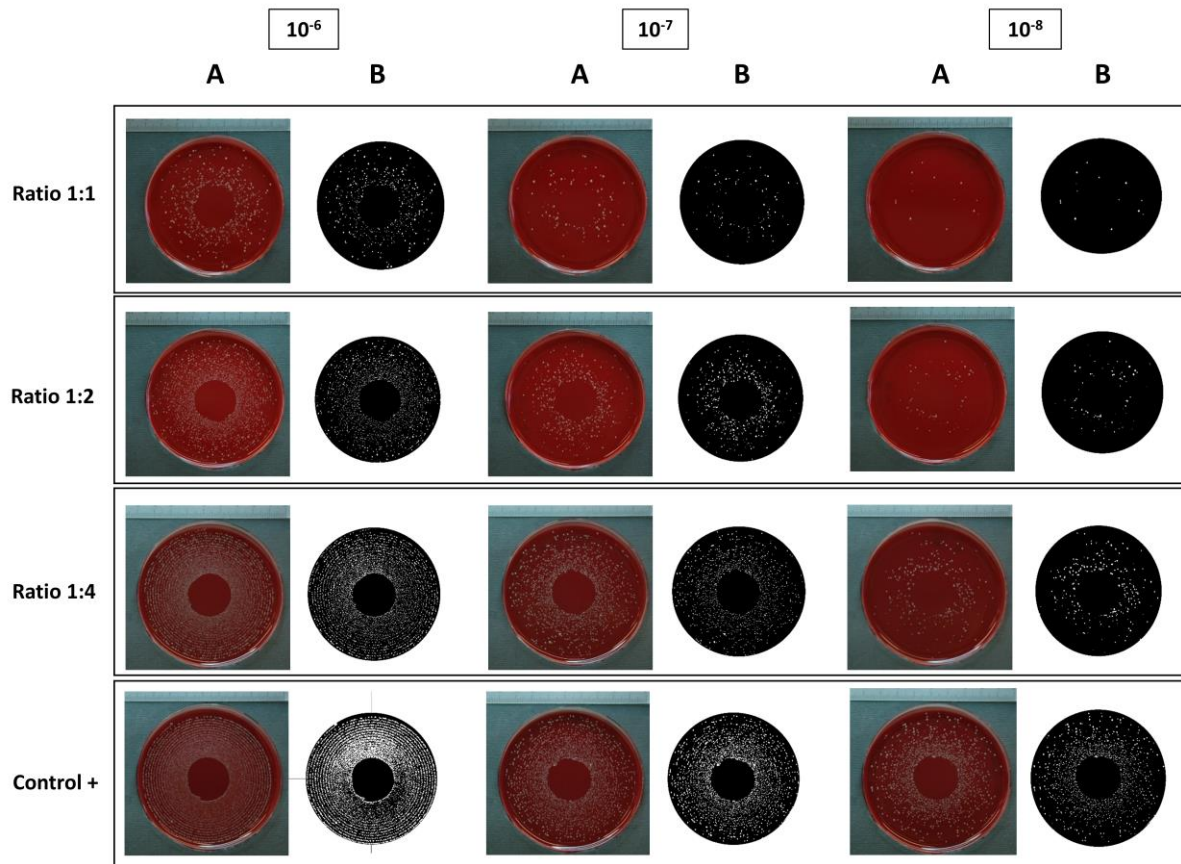

Supplement: 41598_2019_44755_MOESM1_ESM.pdf [file 41598_2019_44755_MOESM1_ESM.pdf]
